# Supplementary material for: Twist-angle-dependent momentum-space direct and indirect interlayer excitons in WSe2/WS2 heterostructure
Source: Royal Society of Chemistry journal article supplement (doi:10.1039/d3ra02952b), 2023-01-01
Supplement: d3ra02952b1.pdf [file d3ra02952b1.pdf]

## Supporting information

### Twist-angle-dependent momentum-space direct and indirect interlayer excitons in WSe<sub>2</sub>/WS<sub>2</sub> heterostructure†

Jiajun Chen,<sup>†a</sup> Xiaofei Yue,<sup>†a</sup> Yabing Shan,<sup>a</sup> Huishan Wang,<sup>b</sup> Jinkun Han,<sup>a</sup> Haomin Wang,<sup>b</sup> Chenxu Sheng,<sup>a</sup> Laigui

Hu,<sup>a</sup> Ran Liu,<sup>a</sup> Weihuang Yang,<sup>\*c</sup> Zhi-Jun Qiu<sup>\*a</sup> and Chunxiao Cong<sup>\*ad</sup>

<sup>a</sup> State Key Laboratory of ASIC & System, School of Information Science and Technology, Fudan University, Shanghai 200433, China.

<sup>b</sup> State Key Laboratory of Functional Materials for Informatics, Shanghai Institute of Microsystem and Information Technology, Chinese Academy of Sciences, Changning Road 865, Shanghai 200050, China.

<sup>c</sup> Engineering Research Center of Smart Microsensors and Microsystems, Ministry of Education, College of Electronics and Information, Hangzhou Dianzi University, Hangzhou 310018, China.

<sup>d</sup> Yiwu Research Institute of Fudan University, Chengbei Road, Yiwu City, 322000 Zhejiang, China.

† These authors contributed equally to this work

† Electronic Supplementary Information (ESI) available. See DOI:

**Fig. S1** (a) and (b) show the optical image and the fluorescence (FL) image of the WSe<sub>2</sub>/WS<sub>2</sub> heterostructures. the FL image shows the strong quench in the heterostructure area, which indicates good contact and strong charge transfer between two layers. **Fig. S1** (c) shows the typical Raman spectrum of the WSe<sub>2</sub>/WS<sub>2</sub> heterostructures, the peak located at  $\sim 248\text{ cm}^{-1}$ ,  $\sim 258\text{ cm}^{-1}$  and  $\sim 416\text{ cm}^{-1}$  corresponding to the in-plane vibration mode and out-of-plane vibration mode of WSe<sub>2</sub> ( $E_{2g}^1(\text{WSe}_2)$ ,  $A_{1g}(\text{WSe}_2)$ ) and out-of-plane vibration mode of WS<sub>2</sub> ( $A_{1g}(\text{WS}_2)$ ), the peak located at  $\sim 350\text{ cm}^{-1}$  can be fitted into three peaks, with the peaks at  $\sim 347\text{ cm}^{-1}$ ,  $\sim 340\text{ cm}^{-1}$  and  $\sim 353\text{ cm}^{-1}$  are corresponding to the longitudinal acoustic mode  $2LA(M)$  and the vibration mode  $E'(M)$  and  $E'(I)$ . The frequency difference between  $A_{1g}$  and  $E_{2g}$  are  $\sim 10\text{ cm}^{-1}$  (WSe<sub>2</sub>) and  $\sim 63\text{ cm}^{-1}$  (WS<sub>2</sub>), which confirm the nature of the monolayer material. **Fig. S1** (d) shows the typical PL spectra of WSe<sub>2</sub> and WS<sub>2</sub>, the peaks located at  $\sim 1.67\text{ eV}$  and  $\sim 1.93\text{ eV}$  corresponding to the intralayer excitons of WSe<sub>2</sub> and WS<sub>2</sub>, these results also confirm the high quality of our sample. **Fig. S1** (e) shows the Raman spectra of the WSe<sub>2</sub>/WS<sub>2</sub> heterostructure with different twist angles.

In order to determine the twist angle between two layers, the polarization-resolved second-harmonic-generation (SHG) microscopy was performed. **Fig. S2** (a) shows the polar plots of the SHG intensity of monolayer WSe<sub>2</sub> and five WSe<sub>2</sub>/WS<sub>2</sub> heterostructures with specific twist angles. For parallel polarization SHG measurement, the SHG intensity is maximum if the polarization axis of the light is along an armchair direction, and the SHG intensity yielding an  $I_{\text{SHG}} \propto \cos^2(3\theta - \theta_0)$ , where  $\theta_0$  is the angle between the armchair direction and the polarization axis of the light. Combined with the intensity mapping measurements of the total SHG intensity (as shown in figure S2 (b)), the twist angle between two layers can be well-determined.<sup>1</sup> Figure S2 (c) shows the measured ratio of the SHG intensity from the heterostructure to the monolayer as a function of twist angles  $\theta$ . Ideally, the SHG intensity of heterostructure with perfectly aligned ( $\theta=0^\circ$ )  $I_{\text{Heterostructure}}$  is expected to be four times that of the SHG intensity of monolayer  $I_{\text{WSe}_2}$ .<sup>2, 3</sup> However, the SHG signal of aligned heterostructure is only  $\sim 2$  times that of the monolayer, which may result from the absorption of electromagnetic waves in materials and the underlying substrate.<sup>2</sup>

**Fig. S3** (a) shows the PL spectrum of the WSe<sub>2</sub>/WS<sub>2</sub> heterostructure. (b) and (c) are the PL intensity mapping at  $\sim 1.4\text{ eV}$  of the WSe<sub>2</sub>/WS<sub>2</sub> heterostructure with a twist angle of  $59.1^\circ$

and 2.1°, respectively. It shows this peak exists only in the heterostructure region which also confirms the nature of the interlayer exciton not the defect-trapped state.<sup>4</sup> Meanwhile, the uniform distribution of the interlayer exciton indicates good conduct between the two layers.

**Fig. S4** shows the polarization-resolved SHG measurements of the WSe<sub>2</sub>/WS<sub>2</sub> fabricated by CVD-grown samples. The results show that the twist angle between the two layers is 1.8°.

In order to eliminate the possibility of the extraction and injection of electrons from the heterostructure by the electrode, we use hBN to shield the influence of the electrode in another heterostructure as shown in **Fig. S5**. The interlayer exciton shows the same trend with the change of voltage, which further confirms that the enhancement of interlayer exciton is a result from the interaction with interlayer exciton and the external electric field.

To further understand the mechanism behind these phenomena, we use DFT calculation to show the interlayer coupling between the two layers. **Fig. S6** shows the structures of WSe<sub>2</sub>/WS<sub>2</sub> heterostructures with twist angles of 0°, 27.8°, 38.2° and 60°, respectively. The structure parameters after relaxation are shown in **table S1**. We noticed that the interlayer distance of WSe<sub>2</sub>/WS<sub>2</sub> heterostructures with twist angles of 0° and 60° are smaller than the twist angle near 30°. This result is consistent with other reports,<sup>5, 6</sup> which proved the stronger interlayer coupling in the WSe<sub>2</sub>/WS<sub>2</sub> heterostructures with twist angles of 0° and 60°. Meanwhile, the interlayer distance of WSe<sub>2</sub>/WS<sub>2</sub> heterostructures with twist angles of 0° and 60° shows a slight difference, which is consistent with our experimental phenomenon that the interlayer exciton in WSe<sub>2</sub>/WS<sub>2</sub> heterostructures with twist angles near 0° and 60° are different (as shown in figure 2). To further reveal the difference of interlayer coupling between WSe<sub>2</sub>/WS<sub>2</sub> heterostructures with different twist angles, the differential charge densities  $\Delta\rho(r)$  are calculated (as shown in **fig. S7**), which are defined as:

$$\Delta\rho(r) = \rho(r) - \rho_{WS_2}(r - r_i) - \rho_{WSe_2}(r - r_i)$$

where  $\rho(r)$  is the charge density of the WSe<sub>2</sub>/WS<sub>2</sub> heterostructure,  $\rho_{WS_2}(r - r_i)$  and  $\rho_{WSe_2}(r - r_i)$  are the charge density of monolayer WS<sub>2</sub> and WSe<sub>2</sub> respectively. The total charge transfer is shown in **Fig. S8**. The charge transfer is strongly enhanced when the twist angle of WSe<sub>2</sub>/WS<sub>2</sub> heterostructures are near 0° and 60°, which are consistent with our experimental results.

Table S2 summarizes some other reports of interlayer exciton. Our work provides a simpler and more efficient method for regulating momentum-space direct and indirect excitons.

## References

1. Van Der Zande, A. M.; Huang, P. Y.; Chenet, D. A.; Berkelbach, T. C.; You, Y.; Lee, G.-H.; Heinz, T. F.; Reichman, D. R.; Muller, D. A.; Hone, J. C., Grains and grain boundaries in highly crystalline monolayer molybdenum disulphide. *Nat. Mater.* **2013**, *12* (6), 554-561.
2. Hsu, W.-T.; Zhao, Z.-A.; Li, L.-J.; Chen, C.-H.; Chiu, M.-H.; Chang, P.-S.; Chou, Y.-C.; Chang, W.-H., Second harmonic generation from artificially stacked transition metal dichalcogenide twisted bilayers. *ACS Nano* **2014**, *8* (3), 2951-2958.
3. Van Der Zande, A. M.; Kunstmann, J.; Chernikov, A.; Chenet, D. A.; You, Y.; Zhang, X.; Huang, P. Y.; Berkelbach, T. C.; Wang, L.; Zhang, F., Tailoring the electronic structure in bilayer molybdenum disulfide via interlayer twist. *Nano Lett.* **2014**, *14* (7), 3869-3875.
4. Kremser, M.; Brotons-Gisbert, M.; Knörzer, J.; Gückelhorn, J.; Meyer, M.; Barbone, M.; Stier, A. V.; Gerardot, B. D.; Müller, K.; Finley, J. J., Discrete interactions between a few interlayer excitons trapped at a MoSe<sub>2</sub>-WSe<sub>2</sub> heterointerface. *npj 2D Materials and Applications* **2020**, *4* (1), 1-6.
5. Huang, S.; Ling, X.; Liang, L.; Kong, J.; Terrones, H.; Meunier, V.; Dresselhaus, M. S., Probing the interlayer coupling of twisted bilayer MoS<sub>2</sub> using photoluminescence spectroscopy. *Nano Lett.* **2014**, *14* (10), 5500-5508.
6. Nayak, P. K.; Horbatenko, Y.; Ahn, S.; Kim, G.; Lee, J.-U.; Ma, K. Y.; Jang, A.-R.; Lim, H.; Kim, D.; Ryu, S., Probing evolution of twist-angle-dependent interlayer excitons in MoSe<sub>2</sub>/WSe<sub>2</sub> van der Waals heterostructures. *ACS Nano* **2017**, *11* (4), 4041-4050.
7. Cho, C.; Wong, J.; Taqieddin, A.; Biswas, S.; Aluru, N. R.; Nam, S.; Atwater, H. A., Highly Strain-Tunable Interlayer Excitons in MoS<sub>2</sub>/WSe<sub>2</sub> Heterobilayers. *Nano Lett.* **2021**, *21* (9), 3956-3964.
8. Ye, T.; Li, J.; Li, D., Charge-Accumulation Effect in Transition Metal Dichalcogenide Heterobilayers. *Small* **2019**, *15* (42).
9. Hanbicki, A. T.; Chuang, H.-J.; Rosenberger, M. R.; Hellberg, C. S.; Sivaram, S. V.; McCreary, K. M.; Mazin, I. I.; Jonker, B. T., Double Indirect Interlayer Exciton in a MoSe<sub>2</sub>/WSe<sub>2</sub> van der Waals Heterostructure. *ACS Nano* **2018**, *12* (5), 4719-4726.
10. Wang, T.; Miao, S.; Li, Z.; Meng, Y.; Lu, Z.; Lian, Z.; Blei, M.; Taniguchi, T.; Watanabe, K.; Tongay, S.; Smirnov, D.; Shi, S.-F., Giant Valley-Zeeman Splitting from Spin-Singlet and Spin-Triplet Interlayer Excitons in WSe<sub>2</sub>/MoSe<sub>2</sub> Heterostructure. *Nano Lett.* **2020**, *20* (1), 694-700.
11. Ciarrocchi, A.; Unuchek, D.; Avsar, A.; Watanabe, K.; Taniguchi, T.; is, A., Polarization switching and electrical control of interlayer excitons in two-dimensional van der Waals heterostructures. *Nat. Photonics* **2019**, *13* (2), 131-+.
12. Kim, J.; Jin, C.; Chen, B.; Cai, H.; Zhao, T.; Lee, P.; Kahn, S.; Watanabe, K.; Taniguchi, T.; Tongay, S.; Crommie, M. F.; Wang, F., Observation of ultralong valley

lifetime in WSe<sub>2</sub>/MoS<sub>2</sub> heterostructures. *SCIENCE ADVANCES* **2017**, 3 (7).

13. Xia, J.; Yan, J.; Wang, Z.; He, Y.; Gong, Y.; Chen, W.; Sum, T. C.; Liu, Z.; Ajayan, P. M.; Shen, Z., Strong coupling and pressure engineering in WSe<sub>2</sub>–MoSe<sub>2</sub> heterobilayers. *Nat. Phys.* **2021**, 17 (1), 92-98.

**Table S1.** The parameters of WSe<sub>2</sub>/WS<sub>2</sub> heterostructure with different twist angles after relaxation. d is the interlayer distance. E<sub>b</sub> is the binding energy and E<sub>total</sub> is the total energy of the system.

|       | d (Å)   | E <sub>b</sub> (eV/cell) | E <sub>total</sub> (eV/cell) |
|-------|---------|--------------------------|------------------------------|
| 0°    | 6.20878 | 0.29962                  | -47.43472                    |
| 27.8° | 6.49819 | 0.24019                  | -47.37554                    |
| 38.2° | 6.49278 | 0.24033                  | -47.37549                    |
| 60°   | 6.24729 | 0.29821                  | -47.43346                    |

**Table S2.** The summarized research on interlayer exciton

| <b>Structure</b>                                       | <b>Method</b>                                                                          | <b>Interlayer exciton type</b>            | <b>Reference</b> |
|--------------------------------------------------------|----------------------------------------------------------------------------------------|-------------------------------------------|------------------|
| <b>stacked<br/>MoS<sub>2</sub>/WSe<sub>2</sub></b>     | strain+PL                                                                              | indirect interlayer<br>exciton            | [7]              |
| <b>stacked<br/>WS<sub>2</sub>/WSe<sub>2</sub></b>      | power dependent PL                                                                     | direct interlayer exciton                 | [8]              |
| <b>stacked<br/>MoSe<sub>2</sub>/WSe<sub>2</sub></b>    | circularly polarized PL                                                                | indirect interlayer<br>exciton            | [9]              |
| <b>stacked<br/>WSe<sub>2</sub>/MoSe<sub>2</sub></b>    | circularly polarized<br>PL+magnetic field<br>dependent PL+gate voltage<br>dependent PL | direct interlayer exciton                 | [10, 11]         |
| <b>stacked<br/>WSe<sub>2</sub>/MoS<sub>2</sub></b>     | ultrafast pump-probe<br>spectroscopy                                                   | direct interlayer exciton                 | [12]             |
| <b>CVD growth<br/>WSe<sub>2</sub>/MoSe<sub>2</sub></b> | diamond anvil<br>cell+PL+DFT                                                           | direct and indirect<br>interlayer exciton | [13]             |
| <b>stacked<br/>WSe<sub>2</sub>/WS<sub>2</sub></b>      | twist angle+circularly<br>polarized PL+ gate voltage-<br>dependent PL+DFT              | direct and indirect<br>interlayer exciton | <b>This work</b> |

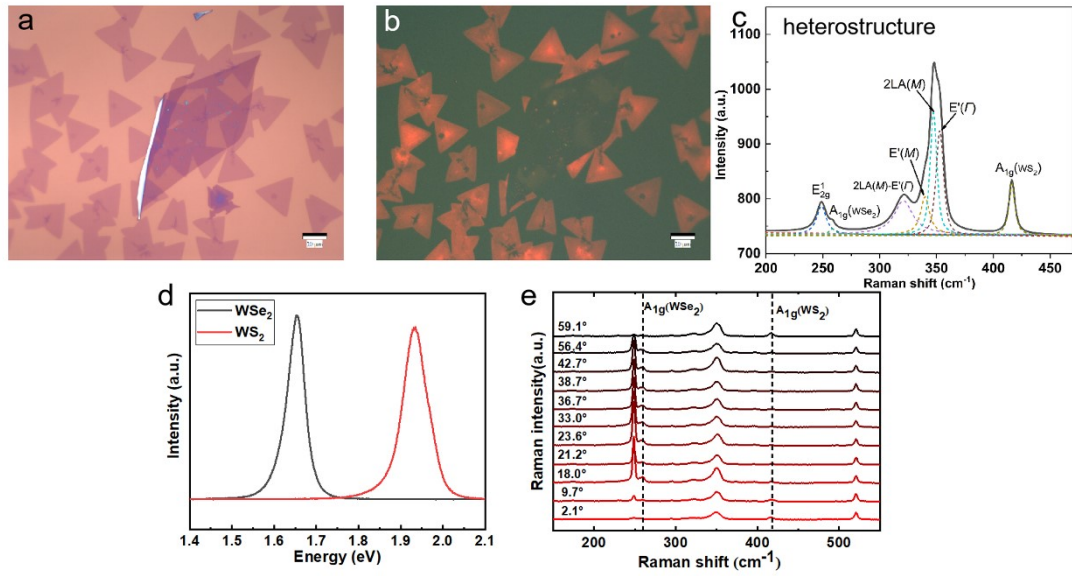

**Fig. S1** (a) Optical image of the WSe<sub>2</sub>/WS<sub>2</sub> heterostructure with different twist angles. (b) The corresponding FL image of the WSe<sub>2</sub>/WS<sub>2</sub> heterostructures with different twist angles shown in (a). (c) The Raman spectrum of the WSe<sub>2</sub>/WS<sub>2</sub> heterostructure. (d) The typical PL spectra of monolayer WSe<sub>2</sub> and WS<sub>2</sub>. (e) The Raman spectra of WSe<sub>2</sub>/WS<sub>2</sub> heterostructure with different twist angles.



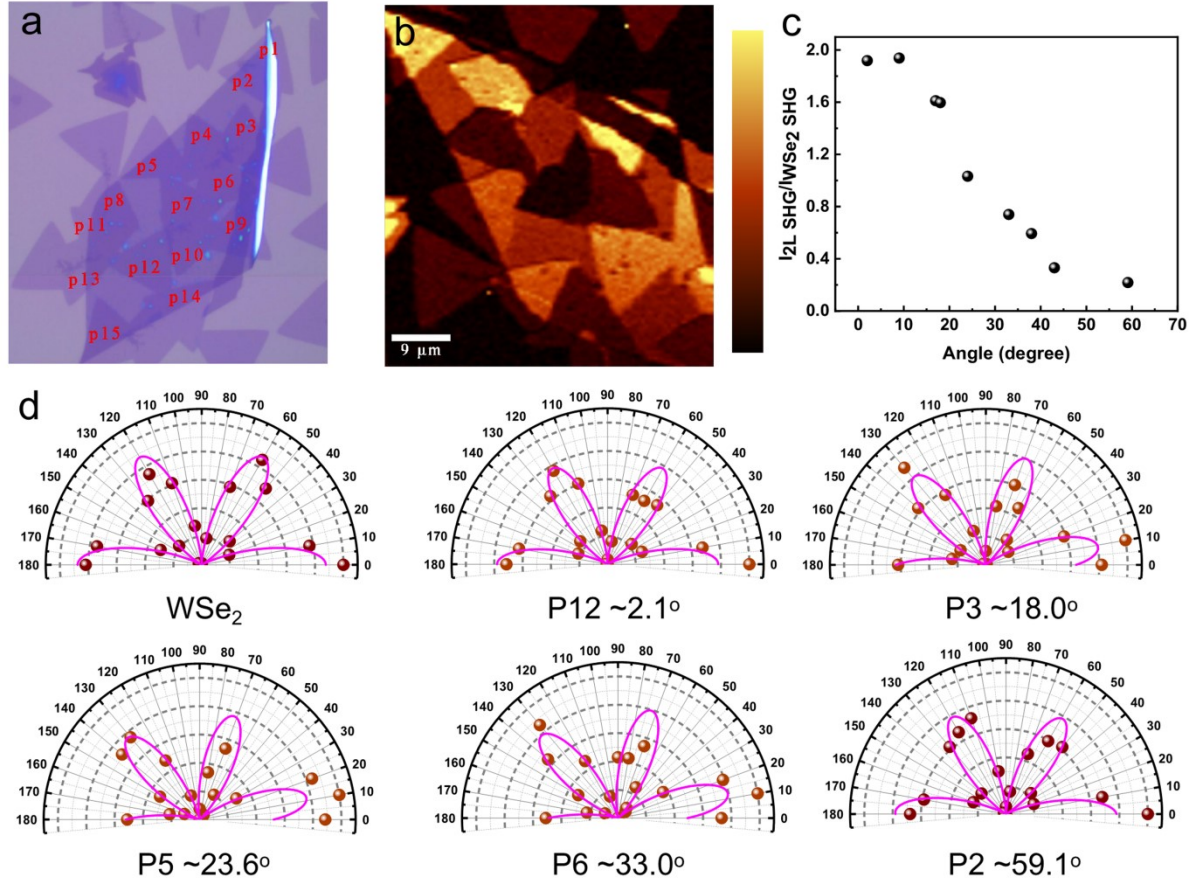

**Fig. S2** (a) Optical image of the WSe<sub>2</sub>/WS<sub>2</sub> heterostructure with different twist angles. (b) The SHG intensity mapping of the WSe<sub>2</sub>/WS<sub>2</sub> heterostructure with different twist angles. (c) The ratio of SHG signal ( $I_{\text{Heterostructure}}/I_{\text{WS}_2}$ ) as a function of twist angle. (d) Typical SHG measurements of WSe<sub>2</sub>/WS<sub>2</sub> heterostructure with different twist angles.

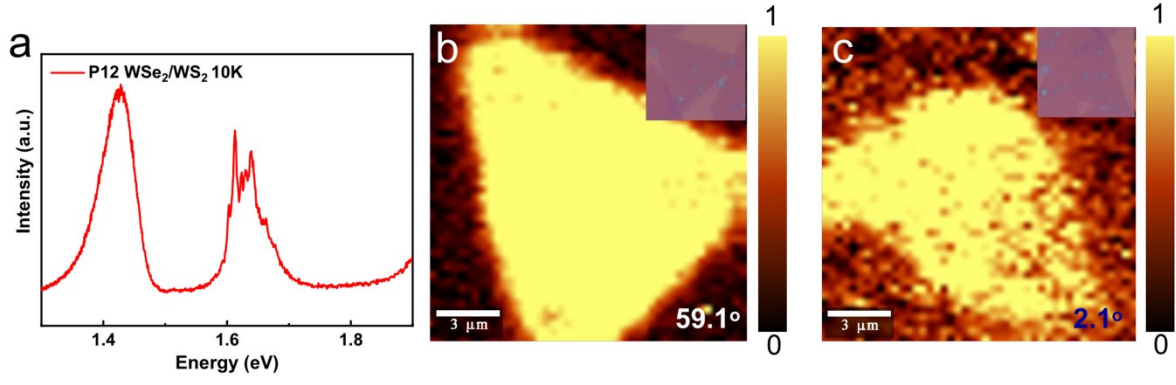

**Fig. S3** (a) The PL spectrum of WSe<sub>2</sub>/WS<sub>2</sub> heterostructure for sample p12. (b) and (c) are the intensity mapping of interlayer exciton of WSe<sub>2</sub>/WS<sub>2</sub> heterostructure with a twist angle of 59.1° and 2.1°, respectively.

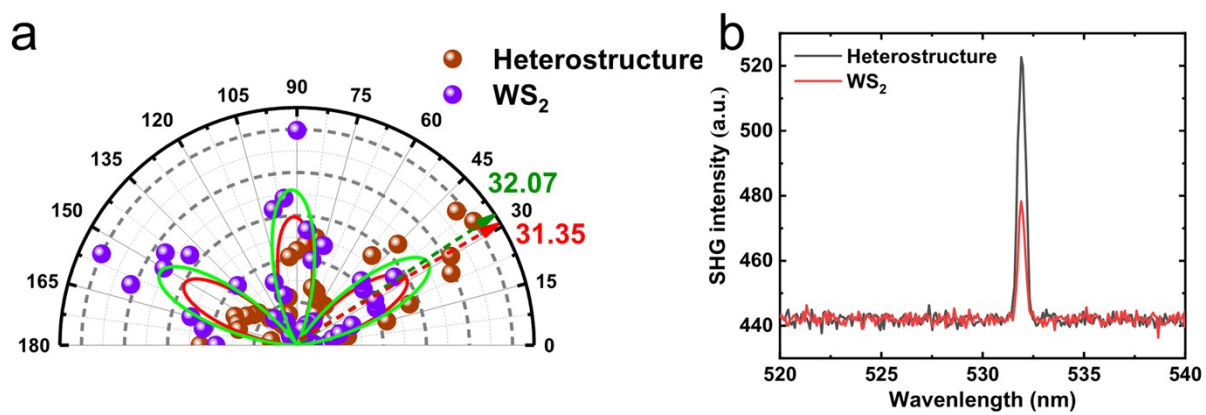

**Fig. S4** (a) and (b) are the SHG measurements of the WSe<sub>2</sub>/WS<sub>2</sub> heterostructure fabricated by the CVD-grown sample.

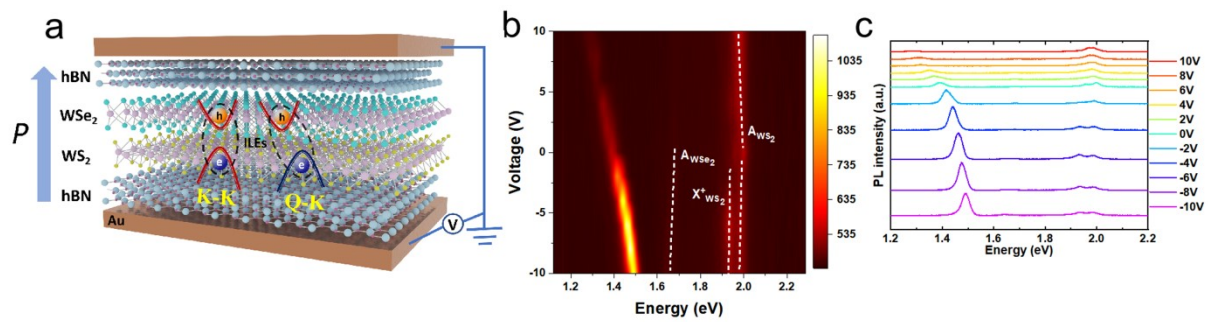

**Fig. S5** (a) The schematic of the gate voltage-dependent PL measurement. (b) Color plot of the PL intensity as a function of the gate voltage. (c) PL spectra at the gate voltage of  $\pm 10$ ,  $\pm 8$ ,  $\pm 6$ ,  $\pm 4$ ,  $\pm 2$ , and 0 V.

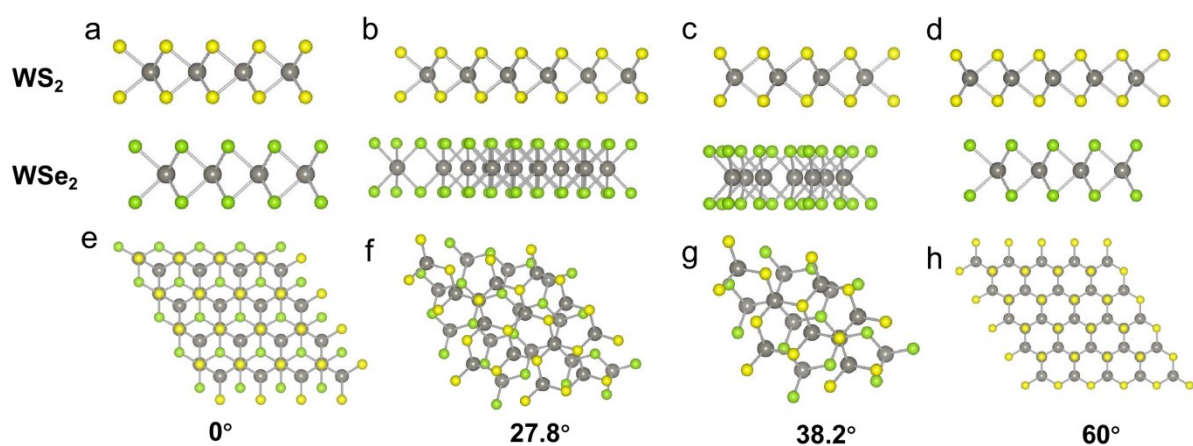

**Fig. S6** (a)-(d) are the side-view of WSe<sub>2</sub>/WS<sub>2</sub> heterostructure with twist angle of 0°, 27.8°, 38.2° and 60°, respectively. (e)-(h) are the top-view of WSe<sub>2</sub>/WS<sub>2</sub> heterostructure with twist angle of 0°, 27.8°, 38.2° and 60°, respectively.

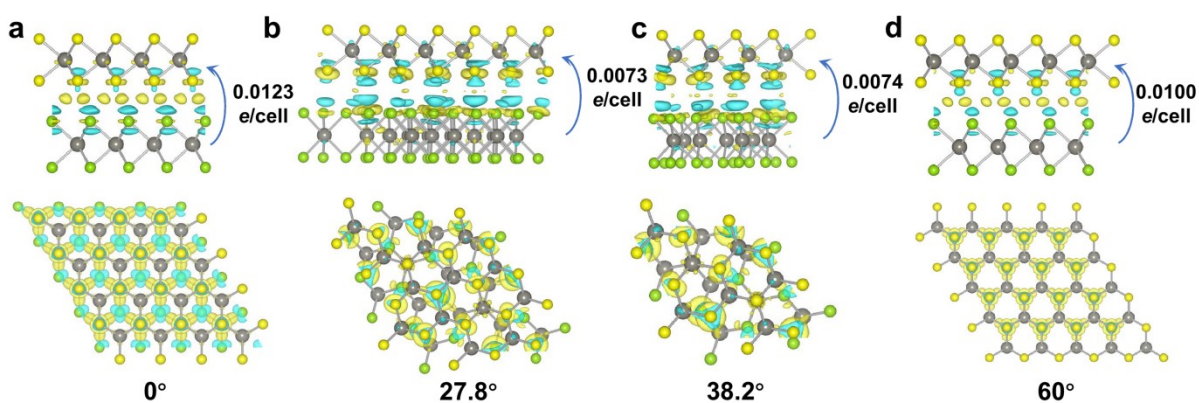

**Fig. S7** (a)-(d) are the differential charge densities of  $\text{WSe}_2/\text{WS}_2$  heterostructures with different twist angles, the isosurface level= $2\text{E}-4$ .

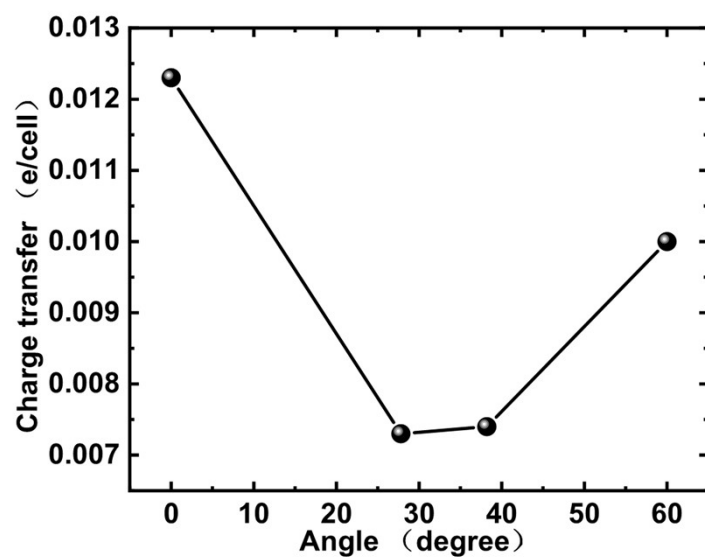

**Fig. S8** The charge transfer versus the twist angles of WSe<sub>2</sub>/WS<sub>2</sub> heterostructure.
